# Supplementary material for: Genomic Consequences of Ecological Speciation in Astyanax Cavefish
Source: PubMed Central journal article supplement (PMC3833966; doi:10.1371/journal.pone.0079903), 2013-11-19

1

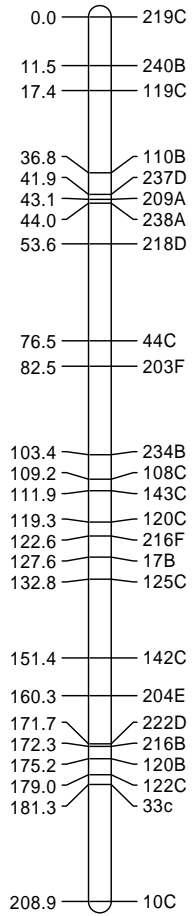

2

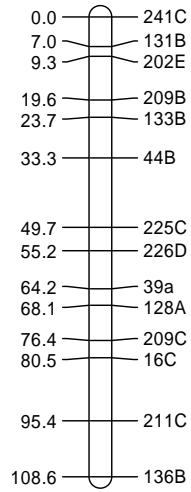

3

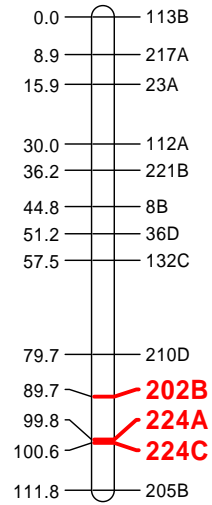

4

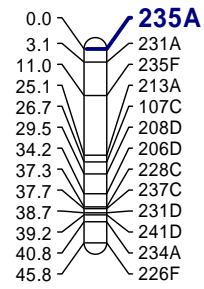

5

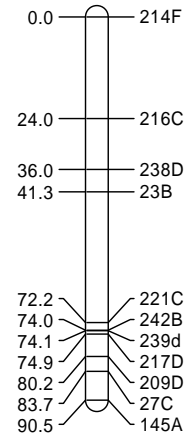

6

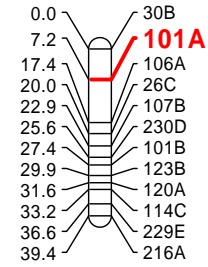

7

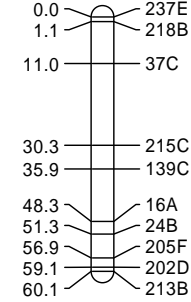

8

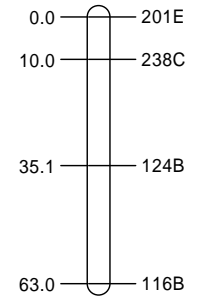

9

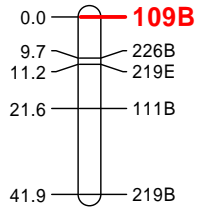

10

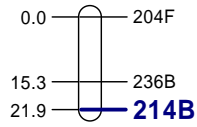

11

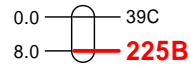

12

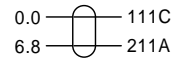

13

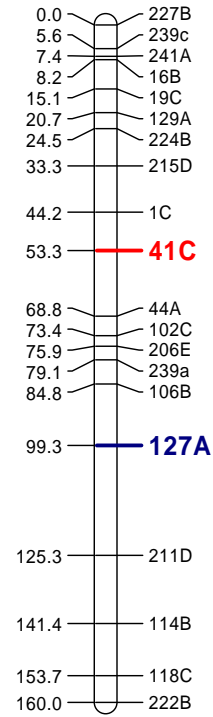

14

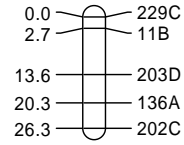

15

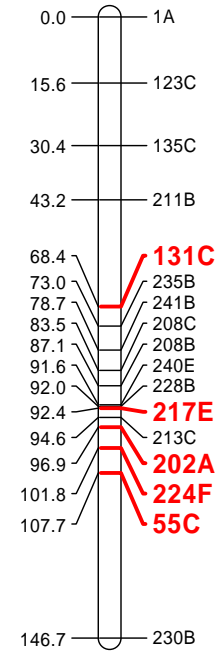

16

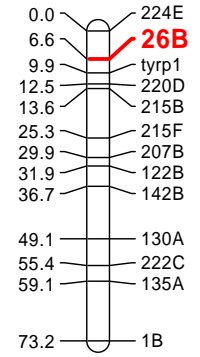

17

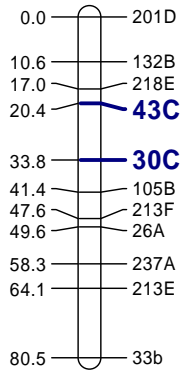

18

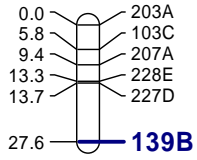

19

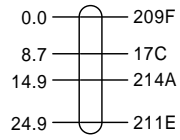

20

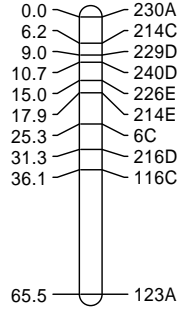

21

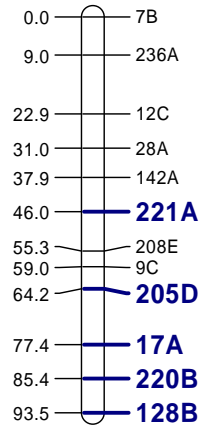

22

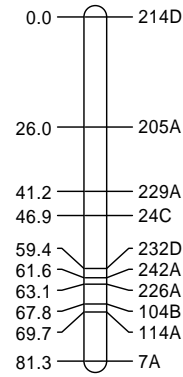

23

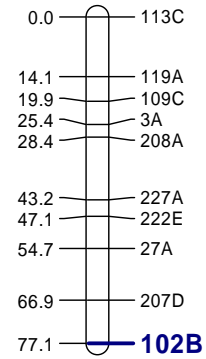

24

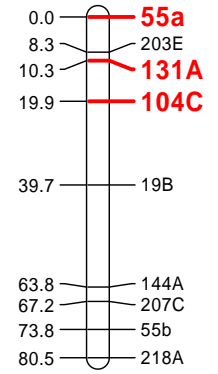

25

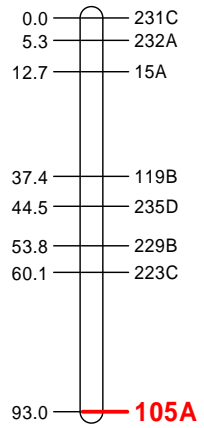

26

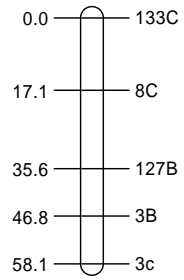

27

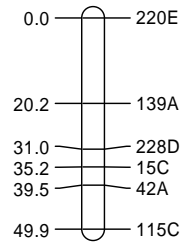

28

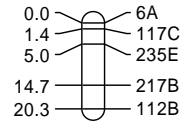

29

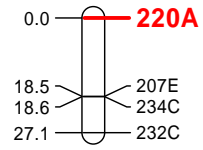

30

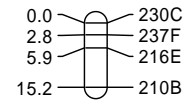

31

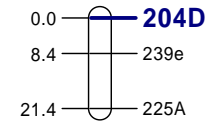

32

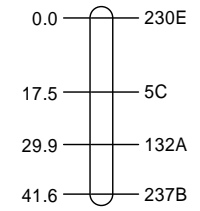

33

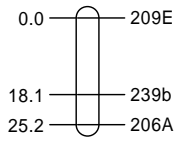

**34**

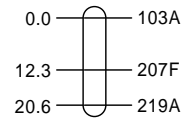

**35**

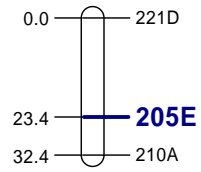

**36**

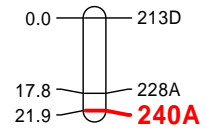

**37**

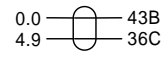

**38**

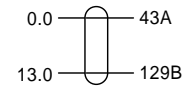

Supplement: pone.0079903.s003.pdf [file pone.0079903.s003.pdf]
