# Supplementary material for: Genomic Consequences of Ecological Speciation in Astyanax Cavefish
Source: PubMed Central journal article supplement (PMC3833966; doi:10.1371/journal.pone.0079903), 2013-11-19

**1A**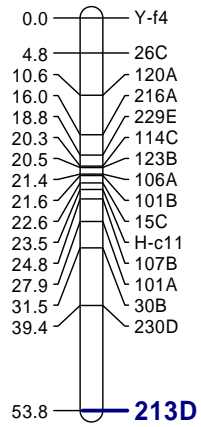**1B**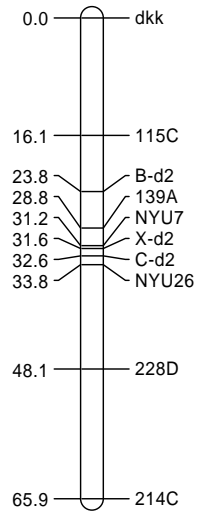**2**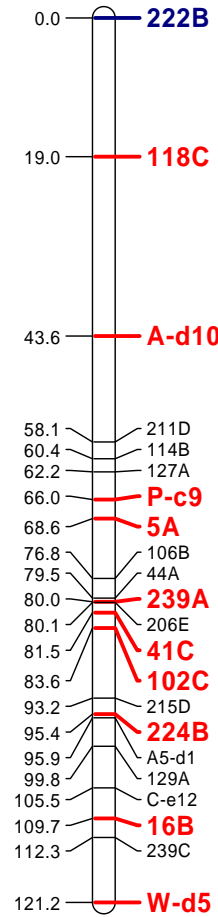**3**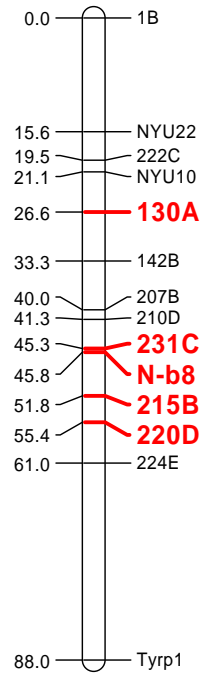**4**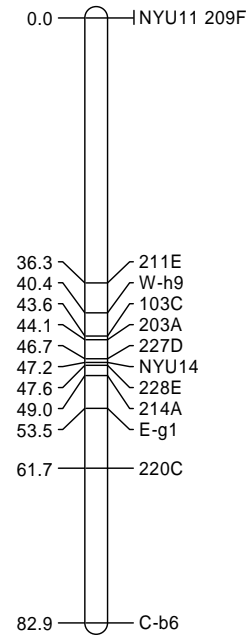**5**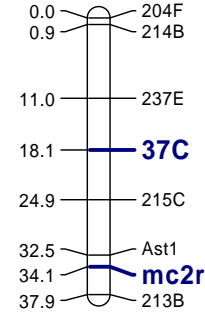**6**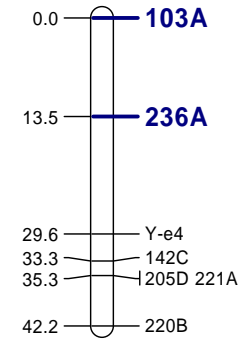**7**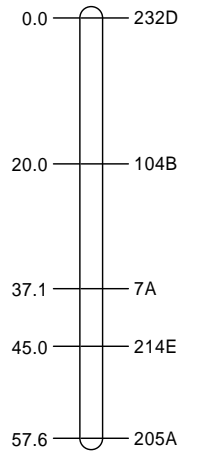

8

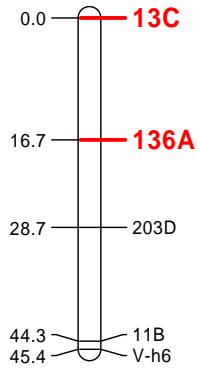

9

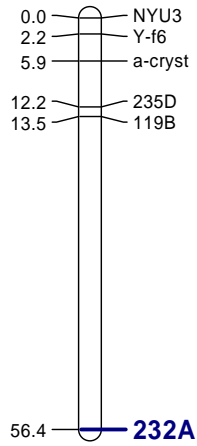

10

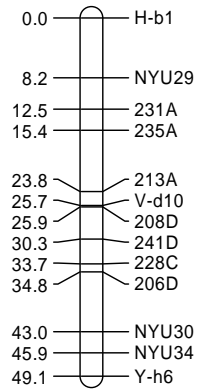

11A

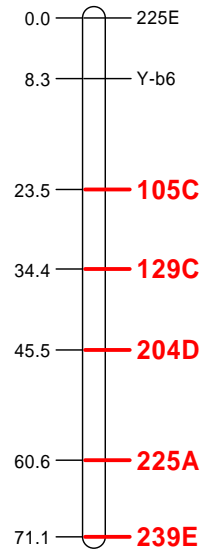

11B

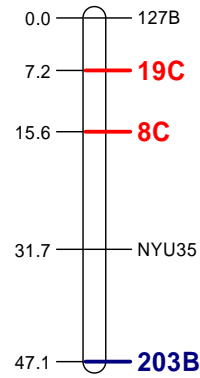

12

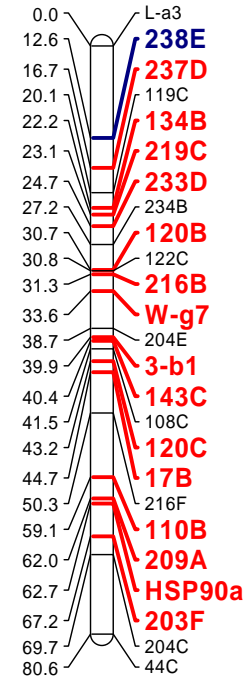

13

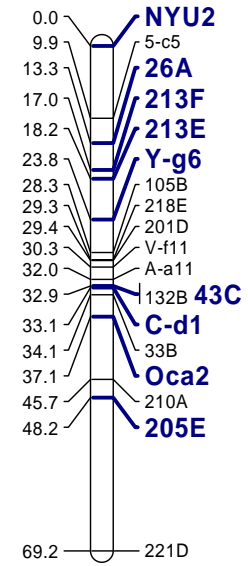

14

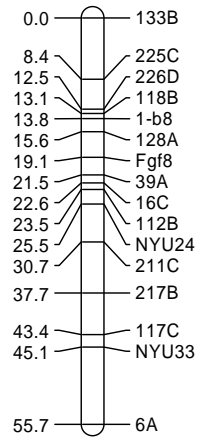

15

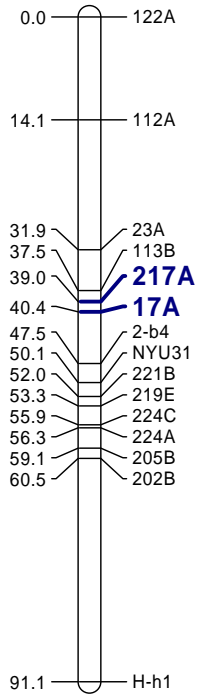

16

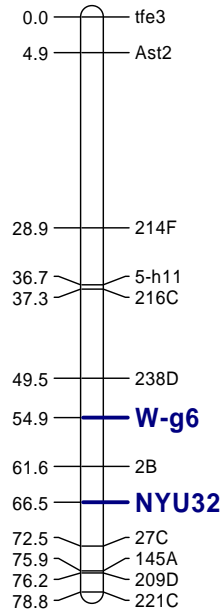

17

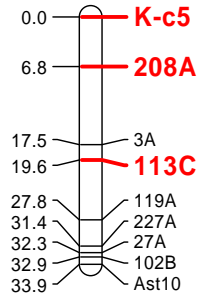

18

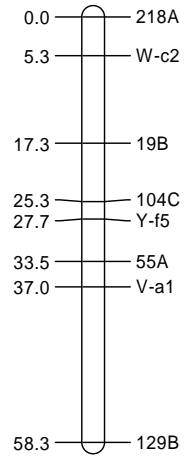

19

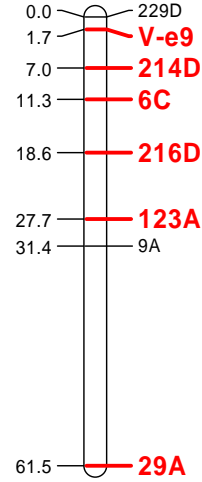

20

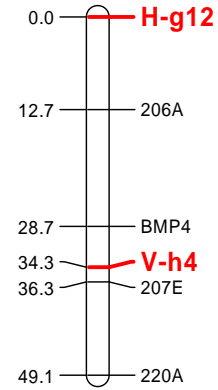

21

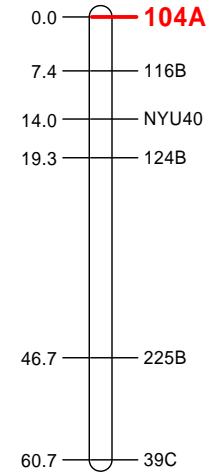

22

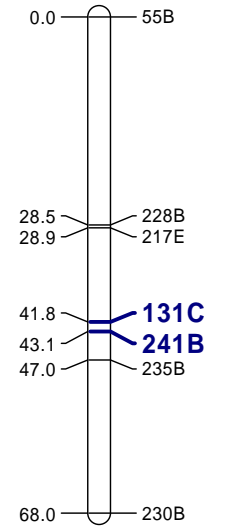

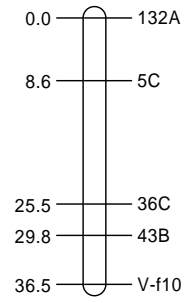

Supplement: pone.0079903.s004.pdf [file pone.0079903.s004.pdf]
