# Supplementary material for: Genomic Consequences of Ecological Speciation in Astyanax Cavefish
Source: PubMed Central journal article supplement (PMC3833966; doi:10.1371/journal.pone.0079903), 2013-11-19

1

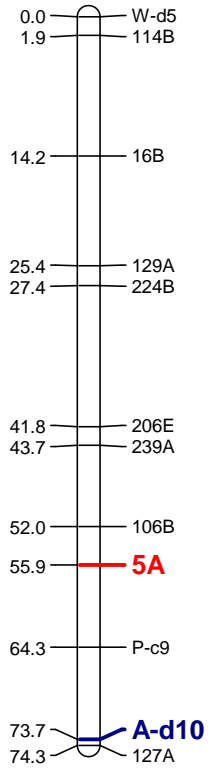

2

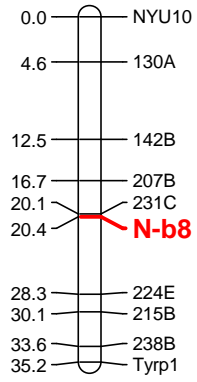

3

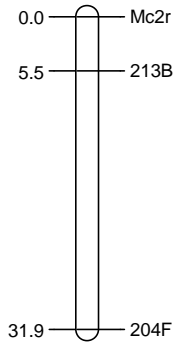

4

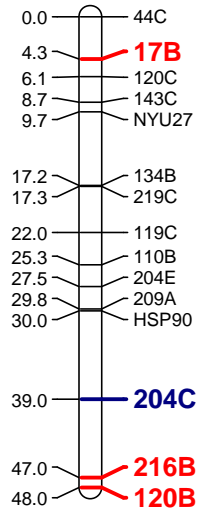

5

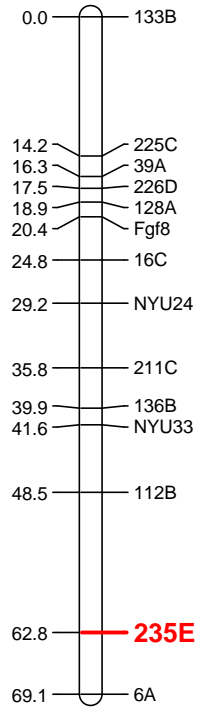

6

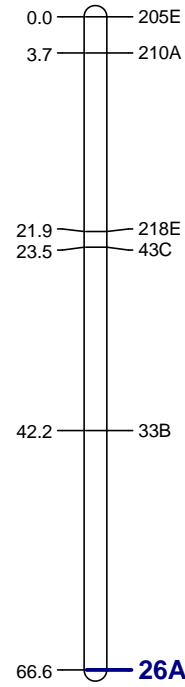

7

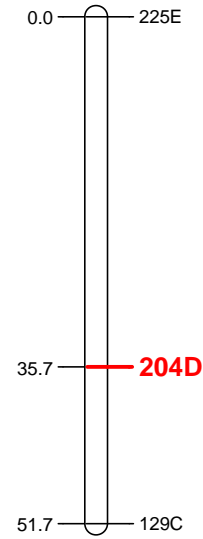

8

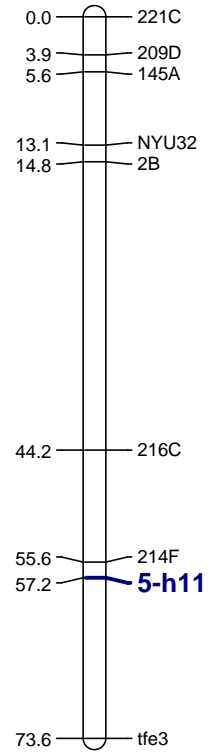

9

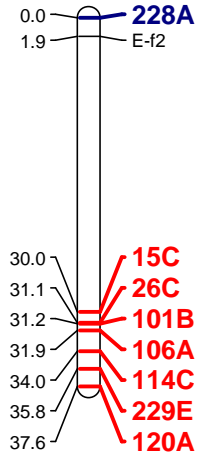

10

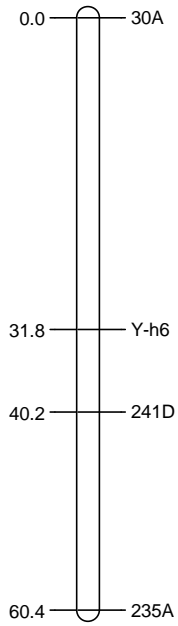

11

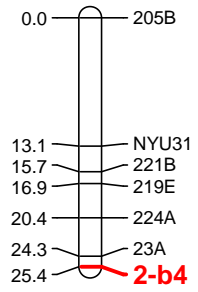

12

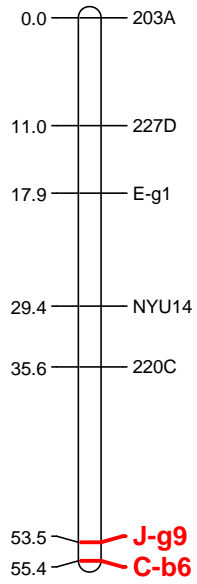

13

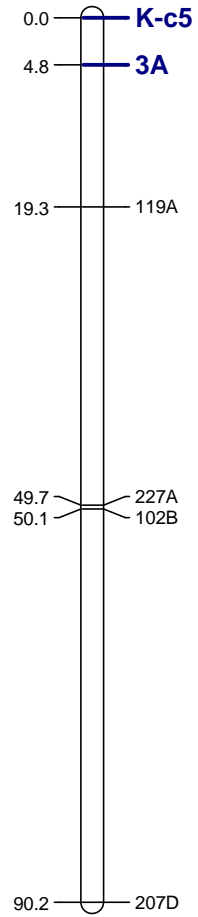

14

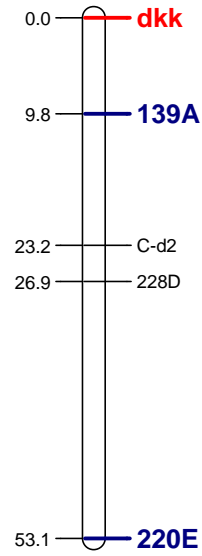

15

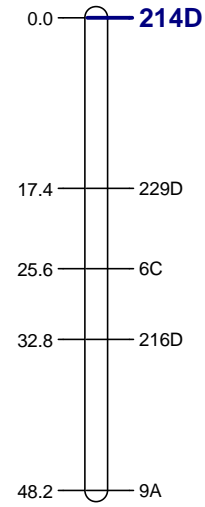

16

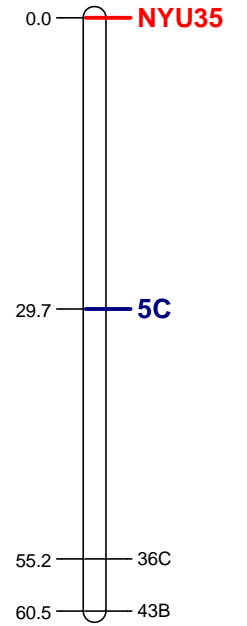

17

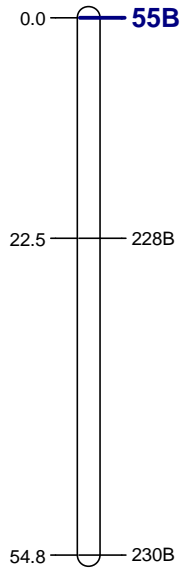

18

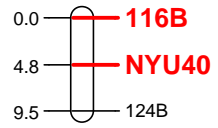

19

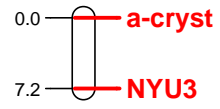

20

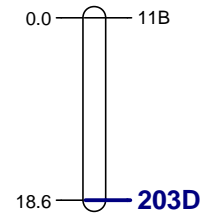

21

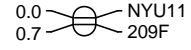

Supplement: pone.0079903.s005.pdf [file pone.0079903.s005.pdf]
